# Supplementary material for: Multifunctional coordination compounds based on lanthanide ions and 5-bromonicotinic acid: magnetic, luminescence and anti-cancer properties
Source: Royal Society of Chemistry journal article supplement (doi:10.1039/c9ce00292h), 2019-01-01
Supplement: c9ce00292h1.pdf [file c9ce00292h1.pdf]

## Multifunctional Coordination Compounds Based on Lanthanide Ions and 5-Bromonicotinic Acid. Magnetic, Luminescence and Anti-Cancer Properties

Cristina Ruiz,<sup>a</sup> Antonio A. García-Valdivia,<sup>a</sup> Belén Fernández,<sup>b</sup> Javier Cepeda,<sup>c</sup> Itziar Oyarzabal,<sup>c</sup> Elisa Abas,<sup>d</sup> Mariano Laguna,<sup>d</sup> Jose Angel García,<sup>e</sup> Ignacio Fernández,<sup>f</sup> Eider San Sebastián<sup>c,\*</sup> and Antonio Rodríguez-Diéguez<sup>a,\*</sup>

- Single crystal X-ray diffraction data for compounds **1-4**
- Continuous shape measurements for compounds **1-4**
- Additional description of structural and packing features of compounds **1-4**
- Magnetic properties
- Additional information on photoluminescence properties of compounds **1-4**

### Single Crystal X-ray Diffraction

**Table S1.** Crystallographic data and refinement details of compounds **1-4**

| Compound                                                               | 1                                                                                | 2                                                                                 | 3                                                                                 | 4                                                                                |
|------------------------------------------------------------------------|----------------------------------------------------------------------------------|-----------------------------------------------------------------------------------|-----------------------------------------------------------------------------------|----------------------------------------------------------------------------------|
| Chem. form.                                                            | C <sub>18</sub> H <sub>17</sub> Br <sub>3</sub> DyN <sub>3</sub> O <sub>10</sub> | C <sub>24</sub> H <sub>19</sub> Br <sub>4</sub> N <sub>4</sub> O <sub>11</sub> Tb | C <sub>24</sub> H <sub>19</sub> Br <sub>4</sub> N <sub>4</sub> O <sub>11</sub> Yb | C <sub>18</sub> H <sub>17</sub> Br <sub>3</sub> N <sub>3</sub> NdO <sub>10</sub> |
| CCDC                                                                   | 1882984                                                                          | 1882985                                                                           | 1882986                                                                           | 1882987                                                                          |
| Form. weight                                                           | 837,57                                                                           | 1017,99                                                                           | 1032,11                                                                           | 819,31                                                                           |
| Cryst. system                                                          | Triclinic                                                                        | Monoclinic                                                                        | Monoclinic                                                                        | Triclinic                                                                        |
| Space group                                                            | <i>P</i> -1                                                                      | <i>P</i> 2/ <i>c</i>                                                              | <i>P</i> 2/ <i>c</i>                                                              | <i>P</i> -1                                                                      |
| <i>a</i> (Å)                                                           | 7.4580(4)                                                                        | 11.686(5)                                                                         | 11.686(5)                                                                         | 10.1630(5)                                                                       |
| <i>b</i> (Å)                                                           | 10.6630(6)                                                                       | 15.970(5)                                                                         | 15.970(5)                                                                         | 11.5260(6)                                                                       |
| <i>c</i> (Å)                                                           | 15.6770(7)                                                                       | 16.742(5)                                                                         | 16.742(4)                                                                         | 11.6110(6)                                                                       |
| $\alpha$ (°)                                                           | 82.162(2)                                                                        | 90.000(5)                                                                         | 90.000(5)                                                                         | 88.319(2)                                                                        |
| $\beta$ (°)                                                            | 87.933(2)                                                                        | 90.246(5)                                                                         | 90.246(5)                                                                         | 85.525(2)                                                                        |
| $\gamma$ (°)                                                           | 72.310(2)                                                                        | 90.000(5)                                                                         | 90.000(5)                                                                         | 69.254(2)                                                                        |
| <i>V</i> (Å <sup>3</sup> )                                             | 1176.64(11)                                                                      | 3124.45(19)                                                                       | 3132.45(21)                                                                       | 1268.03(11)                                                                      |
| <i>Z</i>                                                               | 2                                                                                | 4                                                                                 | 4                                                                                 | 2                                                                                |
| GOF <sup>a</sup>                                                       | 1.024                                                                            | 1.030                                                                             | 1.023                                                                             | 1.017                                                                            |
| R <sub>int</sub>                                                       | 0.0787                                                                           | 0.1106                                                                            | 0.1487                                                                            | 0.0721                                                                           |
| R <sub>1</sub> <sup>b</sup> / wR <sub>2</sub> <sup>c</sup> [I > 2σ(I)] | 0.0275                                                                           | 0.0355                                                                            | 0.0558                                                                            | 0.0278                                                                           |
| R <sub>1</sub> <sup>b</sup> / wR <sub>2</sub> <sup>c</sup> (all data)  | 0.0446                                                                           | 0.0613                                                                            | 0.1166                                                                            | 0.0431                                                                           |

$$[a] S = [\sum w(F_o^2 - F_c^2)^2 / (N_{obs} - N_{param})]^{1/2}$$

$$[b] R_1 = \sum ||F_o| - |F_c|| / \sum |F_o| \quad [c] wR_2 = [\sum w(F_o^2 - F_c^2)^2 / \sum wF_o^2]^{1/2}$$

$$w = 1/[\sigma^2(F_o^2) + (aP)^2 + bP] \text{ where } P = (\max(F_o^2, 0) + 2F_c^2)/3$$

**Table S2.** Selected bond distances (Å) in compounds **1-4**

| <b>1</b>   | <b>2</b>  | <b>3</b>   | <b>4</b> |
|------------|-----------|------------|----------|
| Dy(1)-O(1) | 2.280 (2) | Tb(1)-O(1) | 2.517(3) |
| Dy(1)-O(2) | 2.334 (2) | Tb(1)-O(2) | 2.456(3) |
| Dy(1)-O(3) | 2.515 (2) | Tb(1)-O(3) | 2.456(3) |
| Dy(1)-O(4) | 2.373 (2) | Tb(1)-O(4) | 2.517(3) |
| Dy(1)-O(5) | 2.328 (2) | Tb(1)-O(5) | 2.274(3) |
| Dy(1)-O(6) | 2.381 (3) | Tb(1)-O(6) | 2.274(3) |
| Dy(1)-O(7) | 2.364 (3) | Tb(1)-O(7) | 2.317(3) |
| Dy(1)-O(8) | 2.401 (3) | Tb(1)-O(8) | 2.317(3) |
|            |           | Tb(2)-O(9) | 2.382(3) |
|            |           | Tb(2)-O10  | 2.518(3) |
|            |           | Tb(2)-O11  | 2.518(3) |
|            |           | Tb(2)-O12  | 2.382(3) |
|            |           | Tb(2)-O13  | 2.334(3) |
|            |           | Tb(2)-O14  | 2.288(3) |
|            |           | Tb(2)-O15  | 2.288(3) |
|            |           | Tb(2)-O16  | 2.334(3) |
|            |           | Yb(1)-O(1) | 2.494(4) |
|            |           | Yb(1)-O(2) | 2.411(4) |
|            |           | Yb(1)-O(3) | 2.411(4) |
|            |           | Yb(1)-O(4) | 2.494(4) |
|            |           | Yb(1)-O(5) | 2.222(4) |
|            |           | Yb(1)-O(6) | 2.222(4) |
|            |           | Yb(1)-O(7) | 2.267(5) |
|            |           | Yb(1)-O(8) | 2.267(5) |
|            |           | Yb(2)-O(9) | 2.340(5) |
|            |           | Yb(2)-O10  | 2.463(5) |
|            |           | Yb(2)-O11  | 2.463(5) |
|            |           | Yb(2)-O12  | 2.340(5) |
|            |           | Yb(2)-O13  | 2.290(5) |
|            |           | Yb(2)-O14  | 2.245(4) |
|            |           | Yb(2)-O15  | 2.290(5) |
|            |           | Yb(2)-O16  | 2.245(4) |
|            |           | Nd(1)-O(1) | 2.386(2) |
|            |           | Nd(1)-O(4) | 2.507(3) |
|            |           | Nd(1)-O(6) | 2.407(2) |
|            |           | Nd(1)-O(7) | 2.445(2) |
|            |           | Nd(1)-O(8) | 2.476(3) |
|            |           | Nd(1)-O(9) | 2.518(2) |

*Continuous shape measurements for compounds 1-4*

**Table S3.** Continuous Shape Measurements for compound **1**.

|              |            |              |                                        |
|--------------|------------|--------------|----------------------------------------|
| OP-8         | D8h        | 33.634       | Octagon                                |
| HPY-8        | C7v        | 24.161       | Heptagonal pyramid                     |
| HBPY-8       | D6h        | 16.053       | Hexagonal bipyramid                    |
| CU-8         | Oh         | 11.780       | Cube                                   |
| SAPR-8       | D4d        | 3.310        | Square antiprism                       |
| <b>TDD-8</b> | <b>D2d</b> | <b>1.258</b> | <b>Triangular dodecahedron</b>         |
| JGBF-8       | D2d        | 12.545       | Johnson gyrobifastigium                |
| JETBPY-8     | D3h        | 29.152       | Johnson elongated triangular bipyramid |
| JBTPR-8      | C2v        | 3.428        | Biaugmented trigonal prism J50         |
| BTPR-8       | C2v        | 2.840        | Biaugmented trigonal prism             |
| JSD-8        | D2d        | 3.280        | Snub diphenoid J84                     |
| TT-8         | Td         | 12.369       | Triakis tetrahedron                    |
| ETBPY-8      | D3h        | 24.273       | Elongated trigonal bipyramid           |

**Table S4.** Continuous Shape Measurements for compound **2**.

|       | <b>Tb1</b> | <b>Tb2</b> |          |
|-------|------------|------------|----------|
| OP-8  | D8h        | 29.87103   | 33.35908 |
| HPY-8 | C7v        | 23.87768   | 20.78742 |

|              |            |                |                |                                        |
|--------------|------------|----------------|----------------|----------------------------------------|
| HBPY-8       | D6h        | 12.62887       | 17.37903       | Hexagonal bipyramid                    |
| CU-8         | Oh         | 11.50032       | 11.35744       | Cube                                   |
| SAPR-8       | D4d        | 5.12819        | <b>2.11891</b> | <b>Square antiprism</b>                |
| TDD-8        | D2d        | 3.15688        | 2.41183        | Triangular dodecahedron                |
| JGBF-8       | D2d        | 9.68011        | 14.84873       | Johnson gyrobifastigium                |
| JETBPY-8     | D3h        | 24.42354       | 28.54568       | Johnson elongated triangular bipyramid |
| JBTPR-8      | C2v        | 4.10154        | 3.36185        | Biaugmented trigonal prism J50         |
| BTPR-8       | C2v        | 3.87065        | 2.99195        | Biaugmented trigonal prism             |
| <b>JSD-8</b> | <b>D2d</b> | <b>2.69732</b> | 4.78272        | <b>Snub diphenooid J84</b>             |
| TT-8         | Td         | 12.32897       | 11.89917       | Triakis tetrahedron                    |
| ETBPY-8      | D3h        | 22.26482       | 24.09449       | Elongated trigonal bipyramid           |

**Tabla S5.** Continuous Shape Measurements for compound 3.

|              |            | <b>Yb1</b>     | <b>Yb2</b>     |                                        |
|--------------|------------|----------------|----------------|----------------------------------------|
| OP-8         | D8h        | 30.03056       | 32.93346       | Octagon                                |
| HPY-8        | C7v        | 24.05127       | 21.19139       | Heptagonal pyramid                     |
| HBPY-8       | D6h        | 12.92112       | 16.95599       | Hexagonal bipyramid                    |
| CU-8         | Oh         | 11.73851       | 11.13868       | Cube                                   |
| SAPR-8       | D4d        | 5.08143        | 1.98888        | Square antiprism                       |
| <b>TDD-8</b> | <b>D2d</b> | 3.02096        | <b>2.21428</b> | <b>Triangular dodecahedron – Yb2</b>   |
| JGBF-8       | D2d        | 9.58468        | 14.49641       | Johnson gyrobifastigium                |
| JETBPY-8     | D3h        | 24.02648       | 28.52512       | Johnson elongated triangular bipyramid |
| JBTPR-8      | C2v        | 3.75836        | 3.16896        | Biaugmented trigonal prism J50         |
| BTPR-8       | C2v        | 3.72631        | 2.81115        | Biaugmented trigonal prism             |
| <b>JSD-8</b> | <b>D2d</b> | <b>2.42629</b> | 4.48468        | <b>Snub diphenooid J84 – Yb1</b>       |
| TT-8         | Td         | 12.56464       | 11.87074       | Triakis tetrahedron                    |
| ETBPY-8      | D3h        | 22.07686       | 24.28132       | Elongated trigonal bipyramid           |

**Tabla S6.** Continuous Shape Measurements for compound 4.

|       |     |          |                    |
|-------|-----|----------|--------------------|
| OP-8  | D8h | 31.74487 | Octagon            |
| HPY-8 | C7v | 24.76168 | Heptagonal pyramid |

---

|               |            |                |                                        |
|---------------|------------|----------------|----------------------------------------|
| HBPY-8        | D6h        | 16.84210       | Hexagonal bipyramid                    |
| CU-8          | Oh         | 10.80655       | Cube                                   |
| SAPR-8        | D4d        | 2.86138        | Square antiprism                       |
| TDD-8         | D2d        | 0.76376        | Triangular dodecahedron                |
| JGBF-8        | D2d        | 12.76224       | Johnson gyrobifastigium                |
| JETBPY-8      | D3h        | 28.58916       | Johnson elongated triangular bipyramid |
| JBTPR-8       | C2v        | 2.03246        | Biaugmented trigonal prism J50         |
| <b>BTPR-8</b> | <b>C2v</b> | <b>1.34490</b> | <b>Biaugmented trigonal prism</b>      |
| JSD-8         | D2d        | 2.61602        | Snub diphenooid J84                    |
| TT-8          | Td         | 11.35385       | Triakis tetrahedron                    |
| ETBPY-8       | D3h        | 24.49616       | Elongated trigonal bipyramid           |

---

Description of **1**

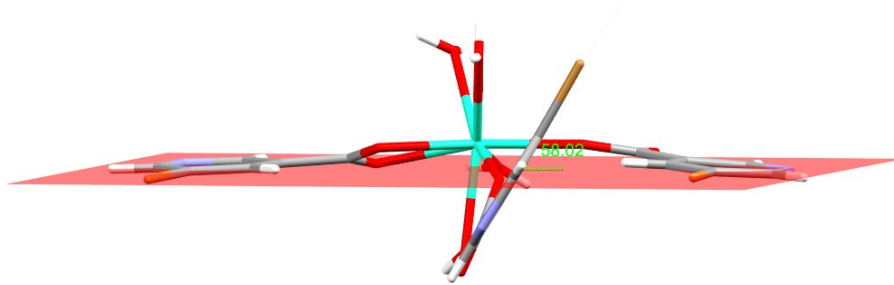

**Figure S1.** Representation of a monomer of **1**. The oxygen atoms of the four coordinated water molecules are nearly co-planar, whereas the plane containing the aromatic ring of the bidentate nicotinate ligand and one of the monodentated ligands, deviates substantially from being perpendicular to the plane generated by the aromatic ring of the second monodentated ligand (dihedral angle 58.02°). All Dy-O distances are in the range of 2.280(2)-2.515(2) Å (Table S2).

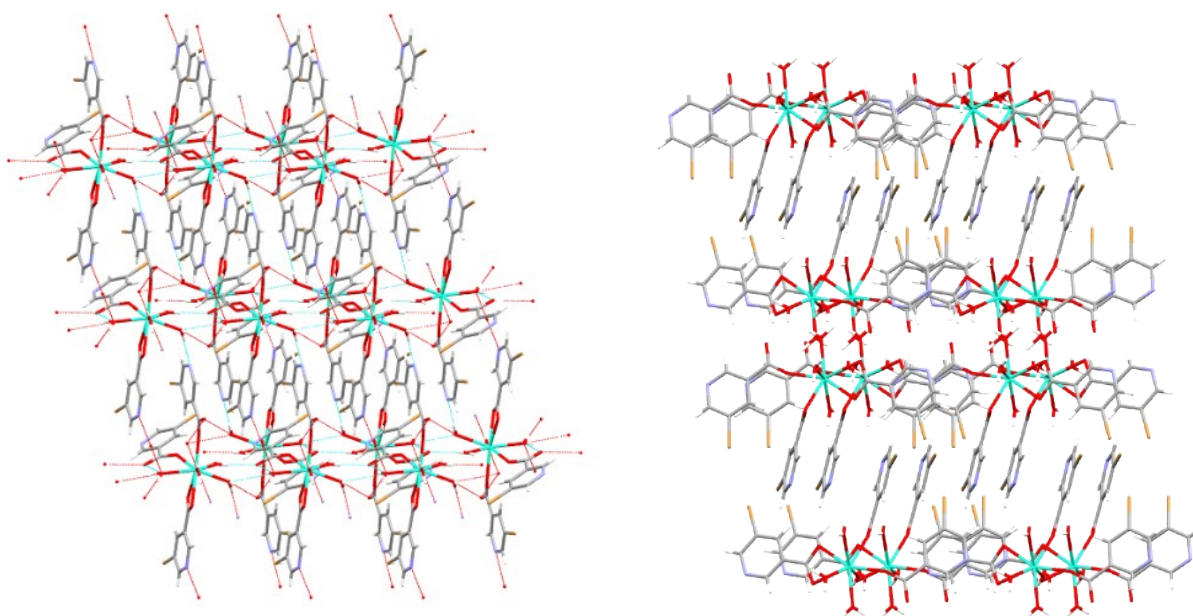

**Figure S2.** Left: A complex hydrogen-bond network along the *a* axis (primarily) links a central monomer of **1** to seven surrounding copies, with H-bond distances in the usual range of 2.654-3.033Å, except that distance is particularly short in the case of the O2A (carboxylate)-O2W (water molecule), with a value of 2.654 Å. Center: Perspective view of the packing of compound **1** along the *a* axis. Briefly, in addition to the multiple intermolecular H-bonds established between the coordination water molecules of **1** and the surrounding monomers, the nicotinic N-atom of one monodentated (N1B) as well as the bidentated (N1C) copies of 5-BrNic, and the free carboxylic oxygen atom of both monodentated 5-BrNic ligands (O2A and O2B), stabilize the crystal packing of **1**. Right: Perspective view of the packing of compound **1** along the *b* axis. The packing of **1** is stabilized by  $\pi$ - $\pi$  stacking interactions established between the aromatic pyridine rings of adjacent monomers. Colour code: Dysprosium, green; oxygen, red; nitrogen blue; carbon, grey; bromine, brown; hydrogen, white.

### Description of **2** and **3**.

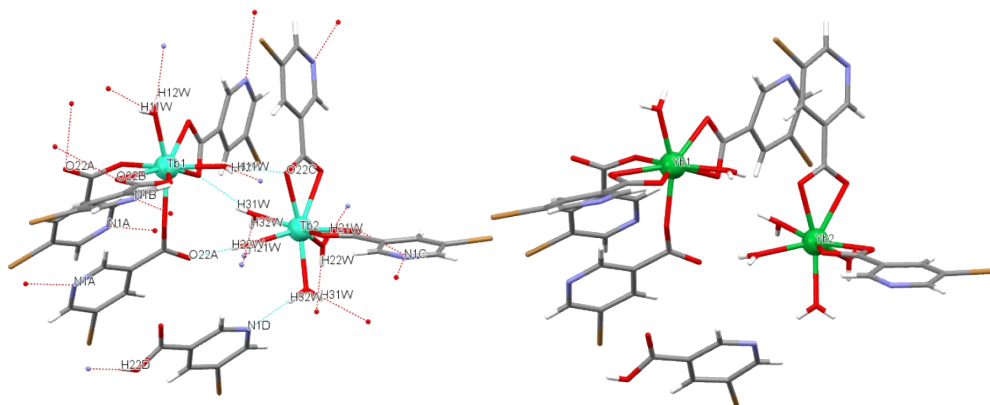

**Figure S3:** Left: Representation of **2** with labels on the atoms establishing H-bonds with surrounding units. A complex 3D hydrogen-bond network links Tb1 and Tb2 units, as well as the crystallization ligand, to each other multiple surrounding copies. Both Tb1 and Tb2 units show a TbO<sub>8</sub> nearly ideal rectangular antiprism environment, derived from the coordination of: two perpendicular 5-BrNic ligands bound to Tb1 in a bidentate fashion via oxygens O1/O2 and O3/O4, two copies of monodentated ligands (O5 and O6) parallel to each other in the *b* axis, and two water molecules. All Tb-O distances are in the usual 2.274(3)-2.517(3) Å (Table S2). The second Tb(III) unit (Tb2), shows a TbO<sub>8</sub> environment, where the cations coordinates to four water molecules via oxygens (O13, O14, O15 and O16), and two chelate bidentated ligands (O9/O10 and O11 y O12) forming a nearly ideal rectangular antiprism. The third unit consists of a protonated 5-HBrNic crystallization ligand. The packing of the structure reveals a unit cell containing 4 Tb(5-BrNic)<sub>4</sub>(H<sub>2</sub>O)<sub>2</sub> (**Tb1**) units, two Tb(5-BrNic)<sub>2</sub>(H<sub>2</sub>O)<sub>4</sub> units and two copies of a 5-HBrNic crystallization ligand. Right: Representation of **3**. The same type of description applies to compound **3**, except that Ln(III)-O distances in **2** are larger than in **3** (see Table S2), which is consistent with the larger nuclear charge of the former.

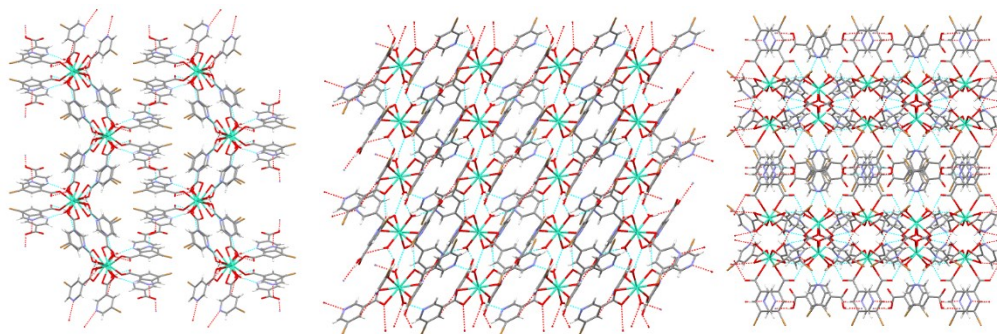

**Figure S4.** Perspective view of the packing of compounds **2** and **3** along the *a* (left), *b* (centre) and *c* (right) axes.

Description of **4**.

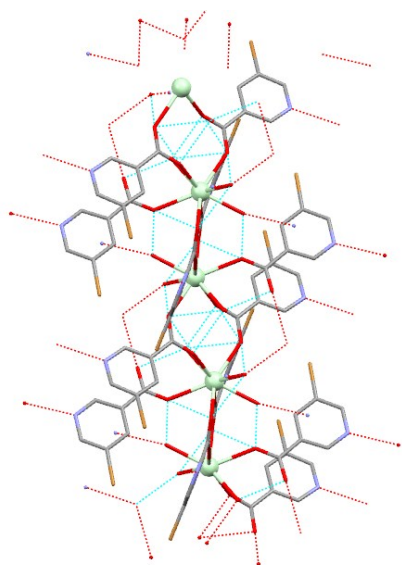

**Figure S5.** Representation of the H-bond network established by a linear chain of **4** along the *b* axis.

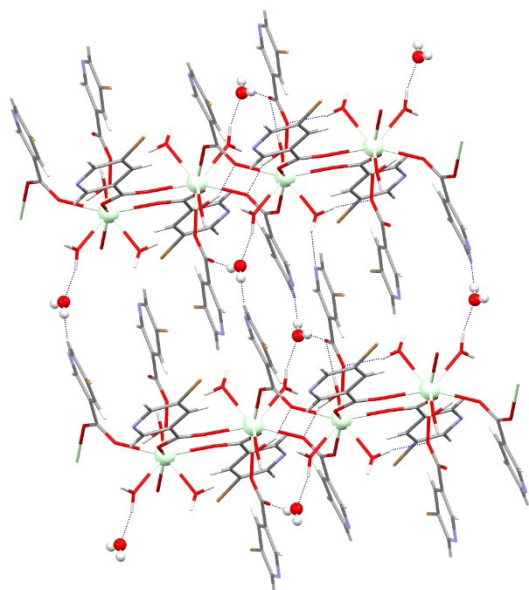

**Figure S6.** Elongation of a linear chain of **4** along the *a* axis packed through a complex network of H-bonds. Colour code: Neodymium, green; oxygen, red; nitrogen blue; carbon, black; hydrogen, white.

*Dc magnetic properties of compounds 1-4*

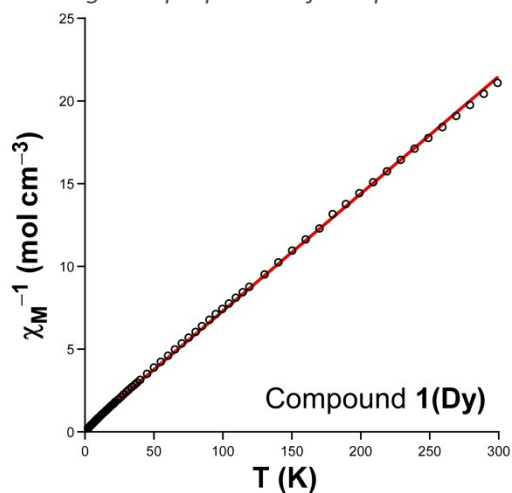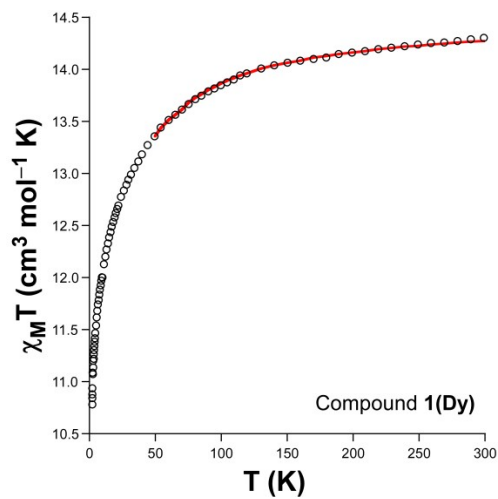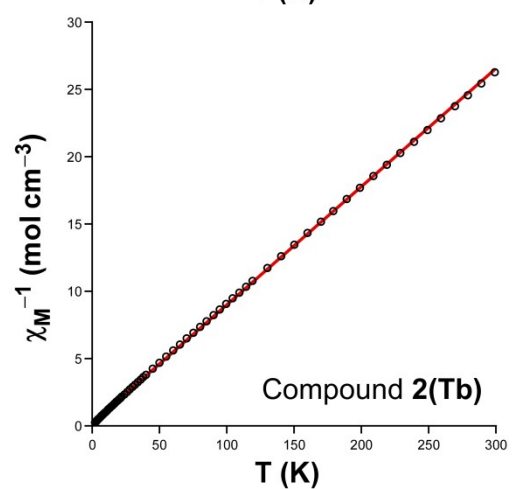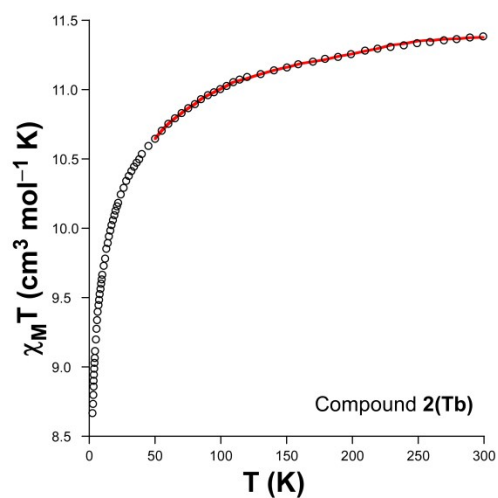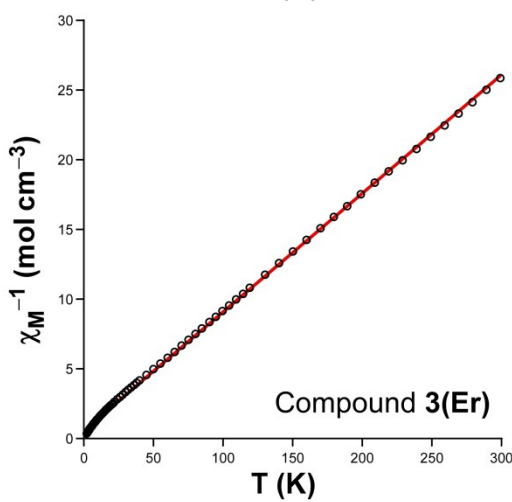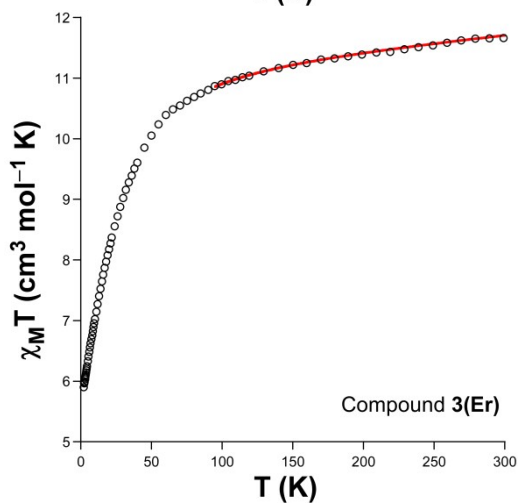



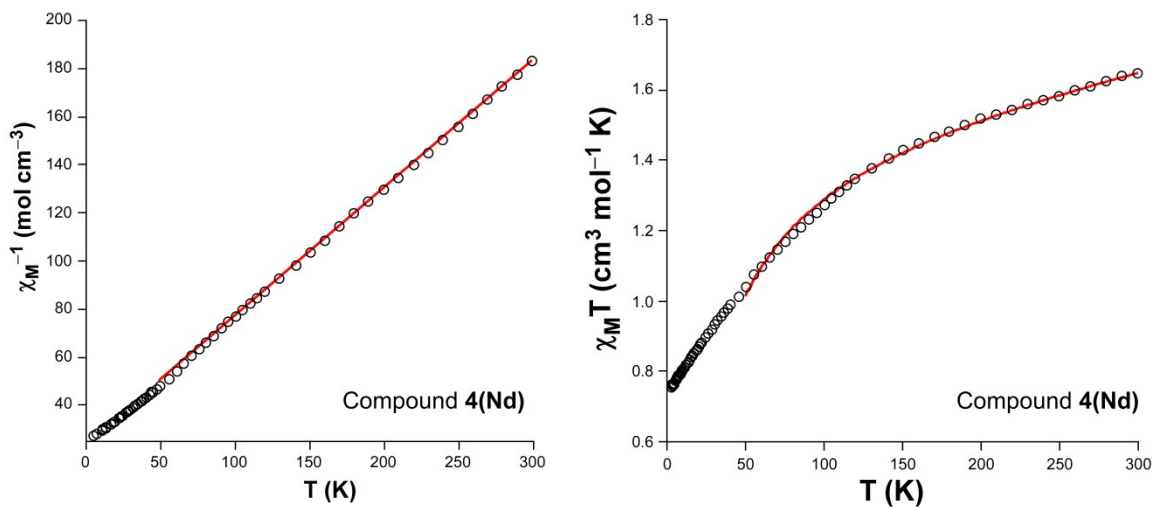

**Figure S7.**  $\chi_M^{-1}$  vs  $T$  and  $\chi_M T$  vs  $T$  plots of compounds 1–4 showing best theoretical fitting (red line).

**Table S7.** Characteristic intense emission peaks/bands of each rare metal studied.

|                  | $\lambda_{\text{ex}}/\lambda_{\text{em}}$ | Assig.                             |
|------------------|-------------------------------------------|------------------------------------|
| Dy <sup>3+</sup> | 480/575                                   | $^4F_{9/2} \rightarrow ^6H_{15/2}$ |
| Tb <sup>3+</sup> | 485/ <b>548</b>                           | $^5D_4 \rightarrow ^7F_5$          |
| Yb <sup>3+</sup> | <b>975</b> /1050                          | $^2F_{5/2} \rightarrow ^2F_{7/2}$  |
| Nd <sup>3+</sup> | <b>900</b> / <b>1060</b>                  | $^4F_{3/2} \rightarrow ^4I_{11/2}$ |

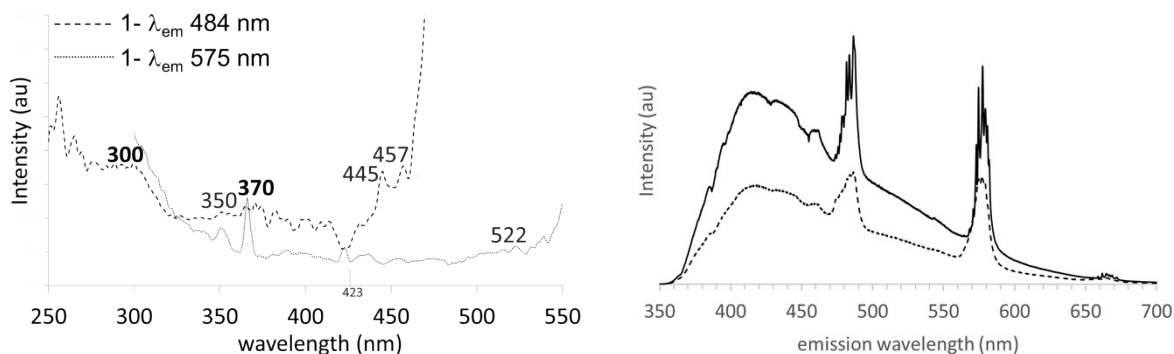

**Figure S8.** Left: Room temperature solid state excitation spectra of **1**, monitored at  $\lambda_{\text{em}}=484\text{nm}$  (dashed line) and  $\lambda_{\text{em}}=575\text{ nm}$  (solid line). The excitation spectra revealed, among others, a wide maximum around 300 nm and a narrow maximum around 370 nm, signals assigned to  $\pi \leftarrow \pi^*$  transitions inside the ligand. Right: Low temperature (50K, dashed line) and room temperature (solid line) solid state emission spectra of **1** upon sample excitation at  $\lambda_{\text{ex}}=325\text{ nm}$ .

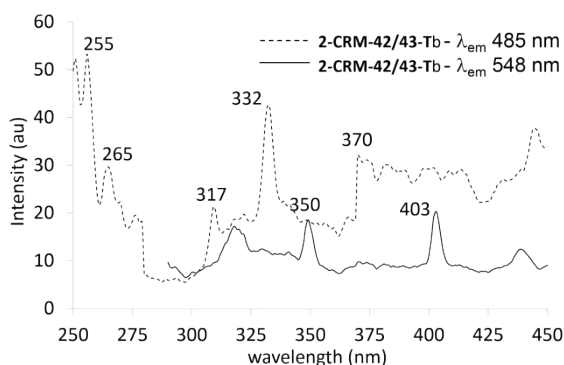

**Figure S9.** Room temperature solid state excitation spectra of **2**, monitored around the metal's (Tb<sup>3+</sup>) more intense emission lines,  $\lambda_{\text{em}}=485\text{nm}$  (dashed line) and  $\lambda_{\text{em}}=548\text{ nm}$  (solid line), assigned to  $^5D_4 \rightarrow ^7F_J$  transitions.

Moreover, for a complete knowledge of our complexes with Caco-2 cells, it has been investigated all compounds with normal cells. Caco-2 cells, upon reaching confluence, form a monolayer of polarized cells, presenting a structure of brush border on the apical surface with tight junctions. This brush border is comparable to the one observed in healthy human small-intestinal tissue, expressing also the same hydrolases, nutrient transporters, bacterial receptors, and other proteins present in enterocytes-like differentiated cells.

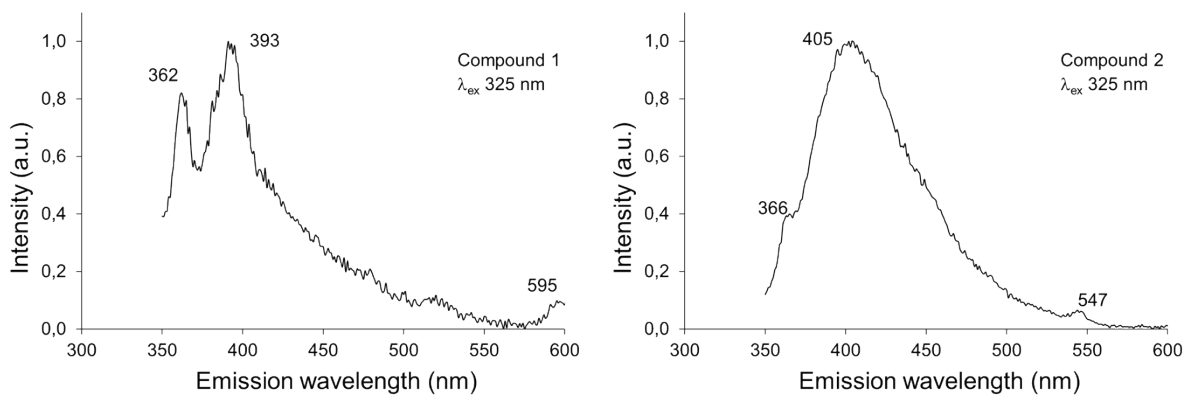

**Figure S10.** Room temperature emission spectra of water solutions of **1** (left) and **2** (right) ( $\lambda_{ex}$ =325nm). The emission spectra revealed that luminescent processes in **1** or **2**, involving the central metal cations, are largely quenched in solution; in this respect, a weak band is observed centered at ca. 595 nm in **1** and ca. 547 nm in **2**, which are negligible compared to the ligand derived emission bands observed at shorter wavelengths.
